# Supplementary material for: Room temperature photoluminescence from [Pt(4′-CCR-tpy)Cl]+ complexes
Source: Royal Society of Chemistry journal article supplement (doi:10.1039/b709886c), 2007-01-01
Supplement: b709886c.pdf [file b709886c.pdf]

# ESI for Room temperature photoluminescence from $[\text{Pt}(4'\text{-CCR-tpy})\text{Cl}]^+$ complexes

Maria L. Muro and Felix N. Castellano\*

*Department of Chemistry and Center for Photochemical Sciences, Bowling Green State University, Bowling Green, Ohio 43403, USA*

**Fig. S1** Representative molecular orbitals calculated for tBuCCtpyPtCl<sup>+</sup> (1).

HOMO

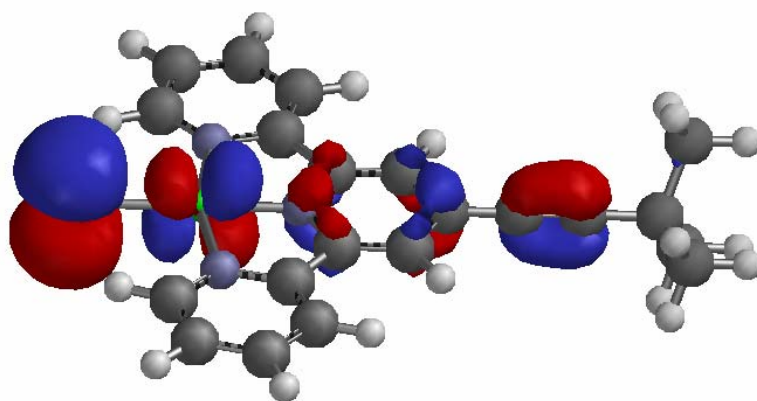

HOMO -1

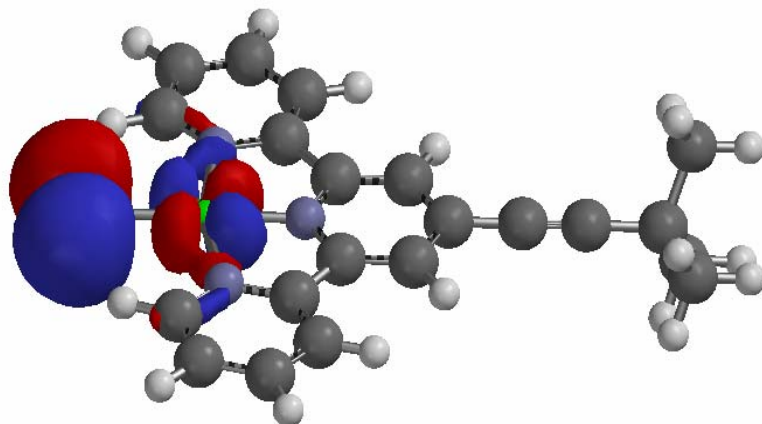

HOMO-2

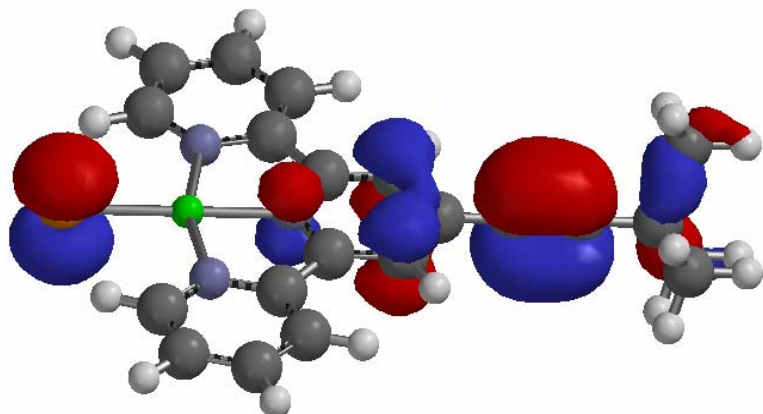

HOMO-3

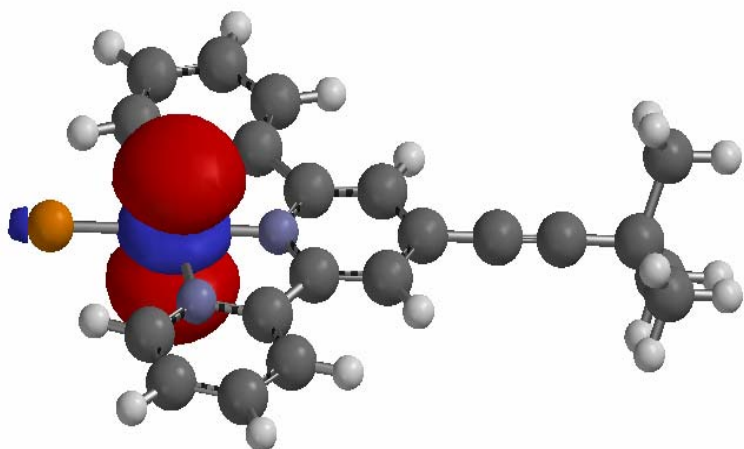

LUMO

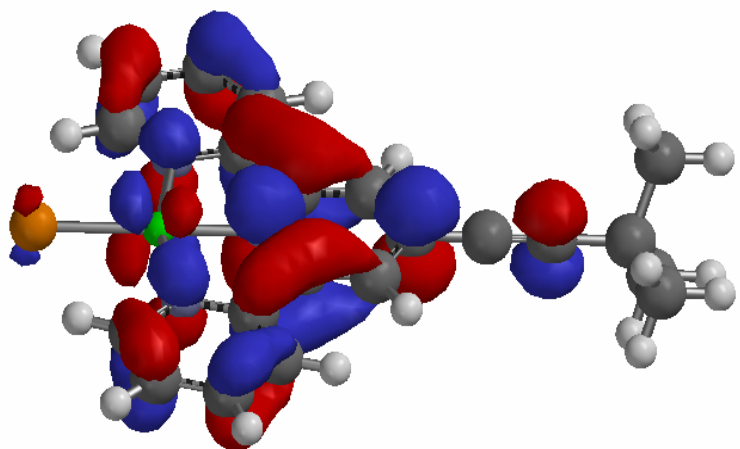

LUMO+1

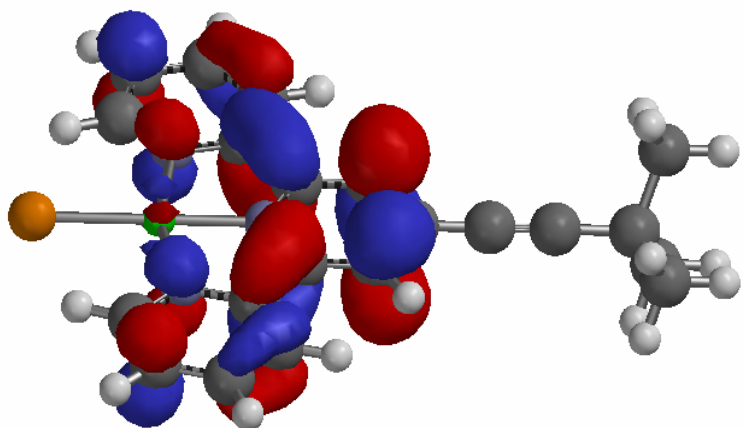

LUMO+2

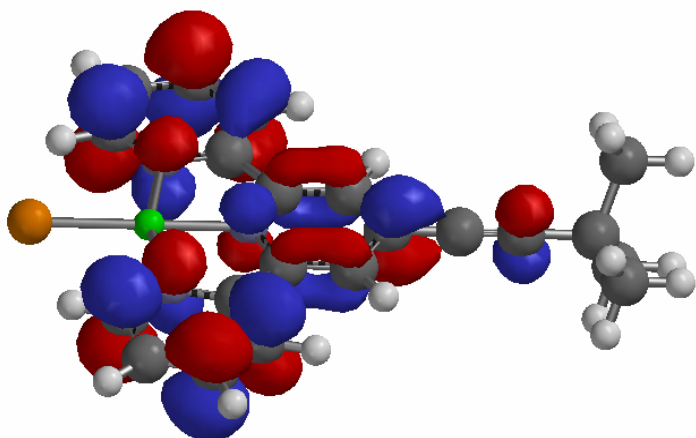

LUMO+3

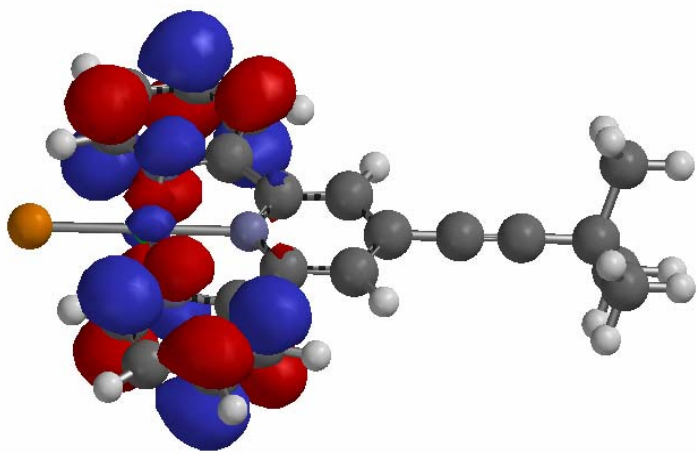

**Fig. S2** Representative molecular orbitals calculated for PhCCtpyPtCl<sup>+</sup> (**2**)

HOMO

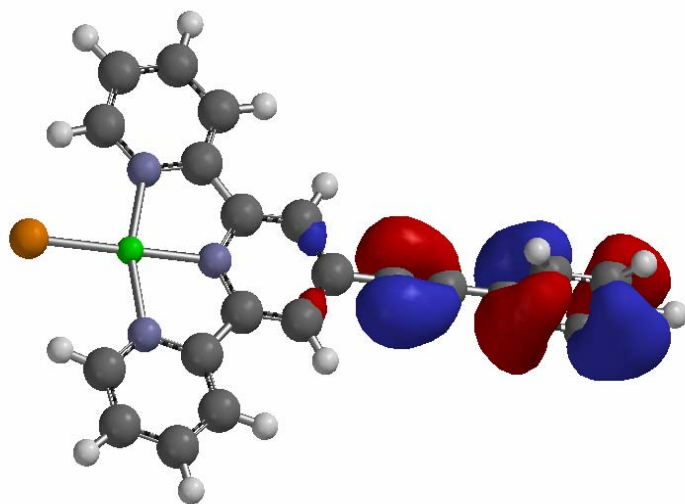

HOMO-1

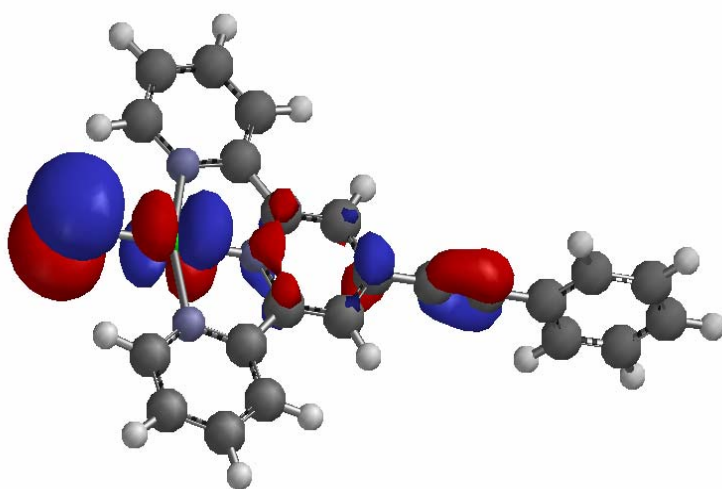

HOMO-2

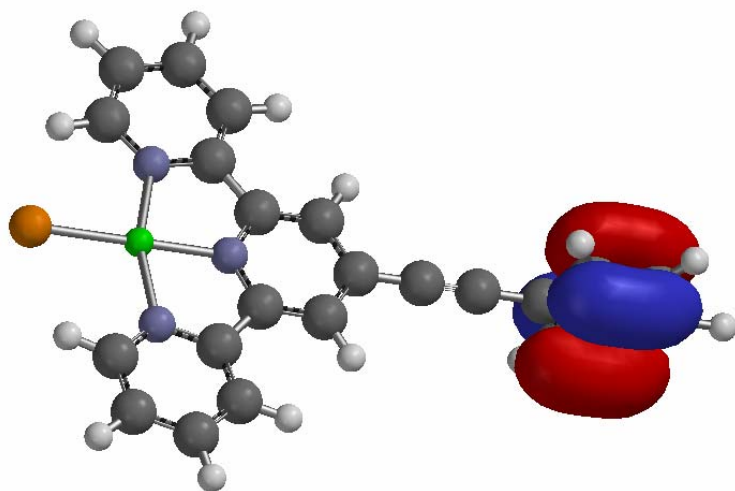

HOMO-3

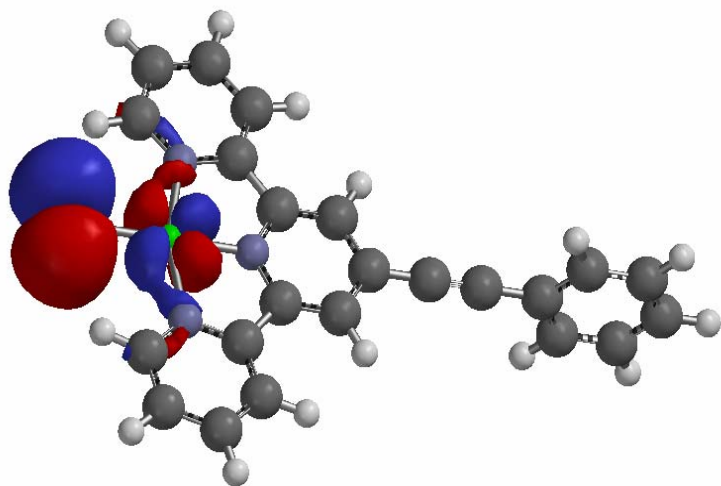

LUMO

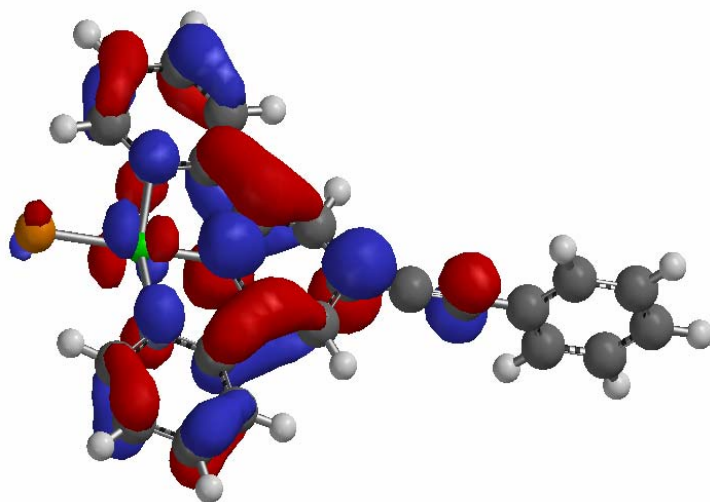

LUMO+1

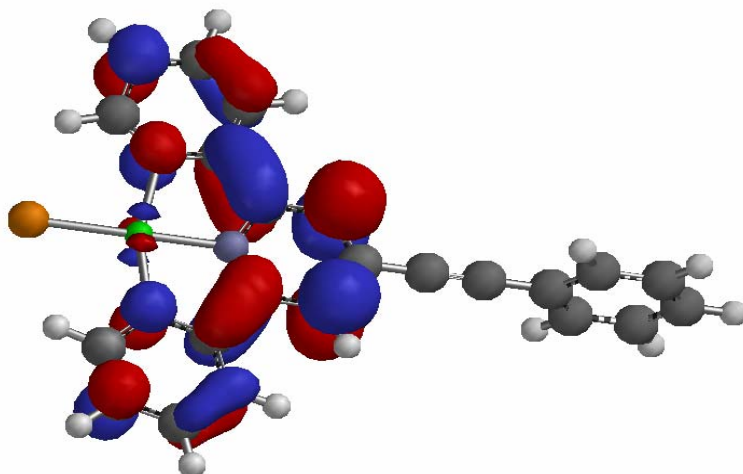

LUMO+2

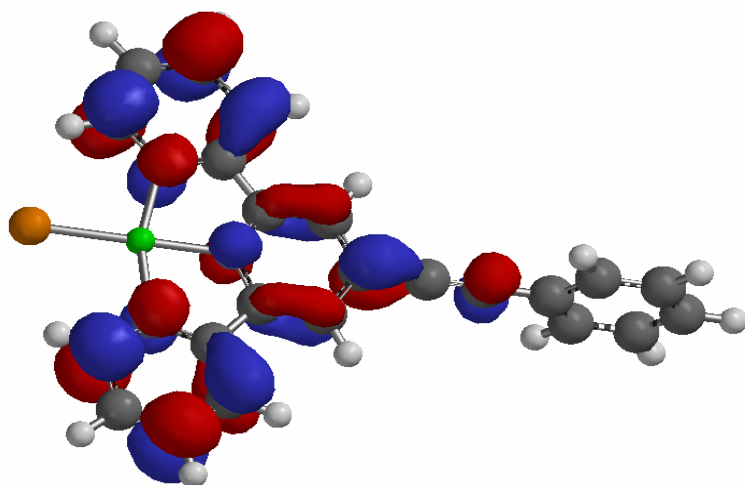

LUMO+3

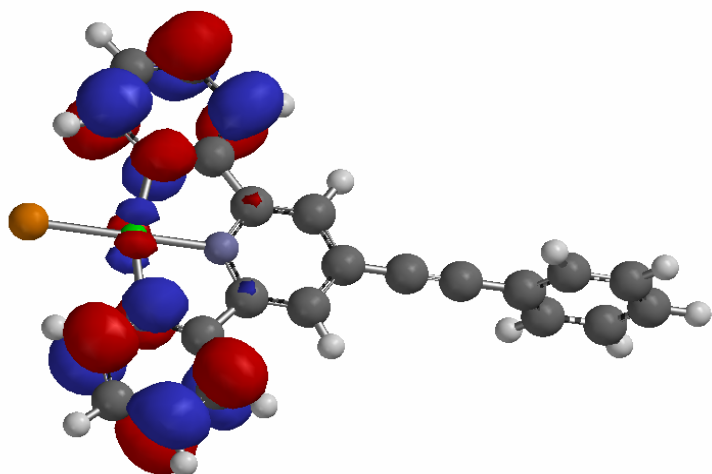

**Fig. S3** Representative molecular orbitals calculated for  $\text{tpyPtCl}^+$

HOMO

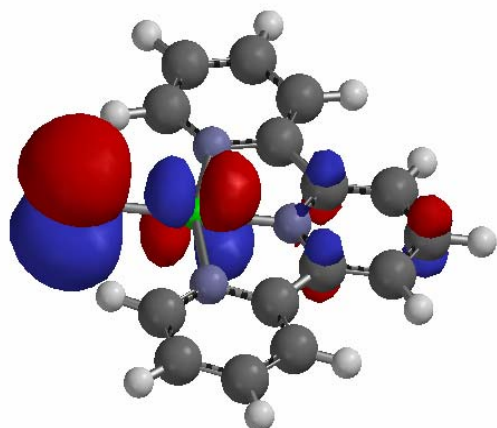

HOMO-1

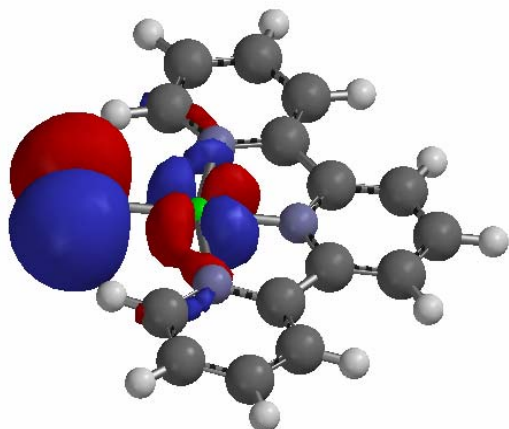



HOMO-2

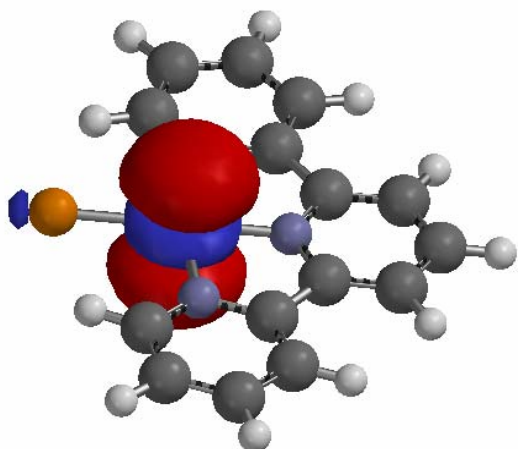

HOMO-3

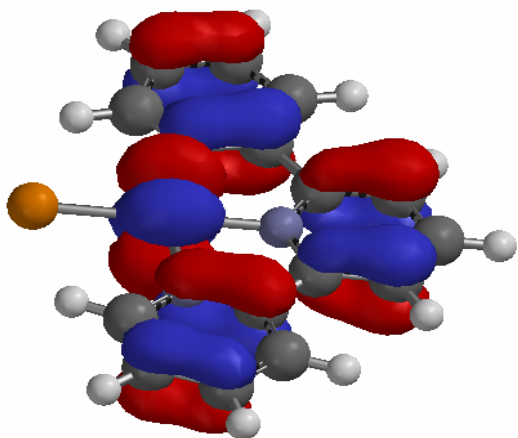

LUMO

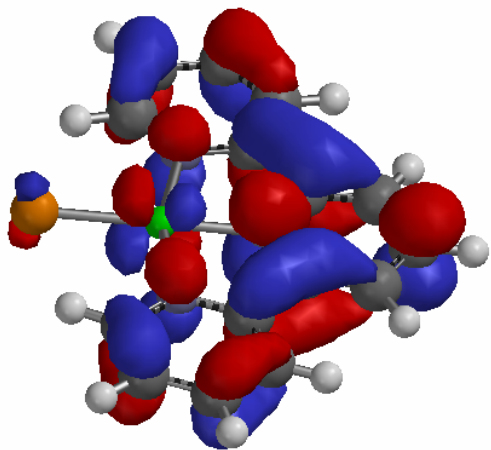

LUMO+1

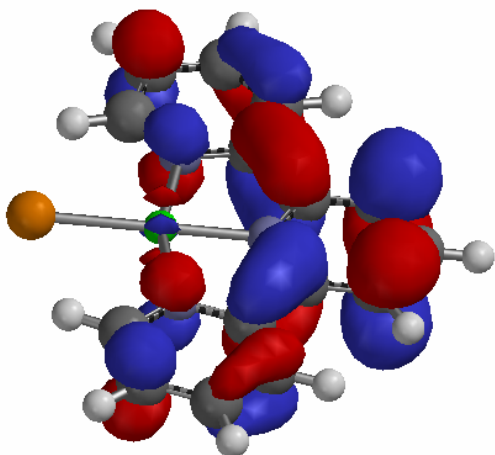

LUMO+2

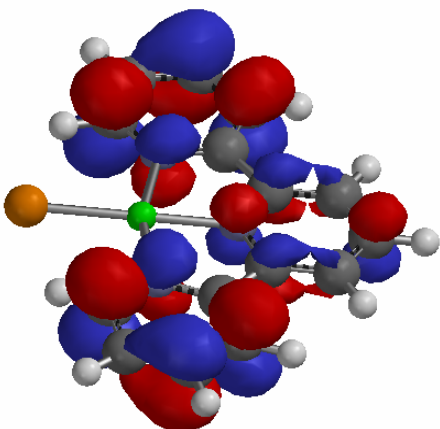

LUMO+3

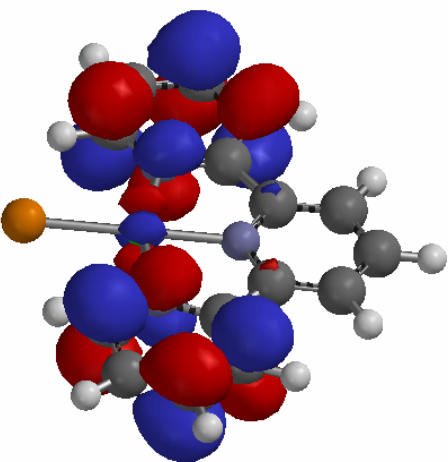

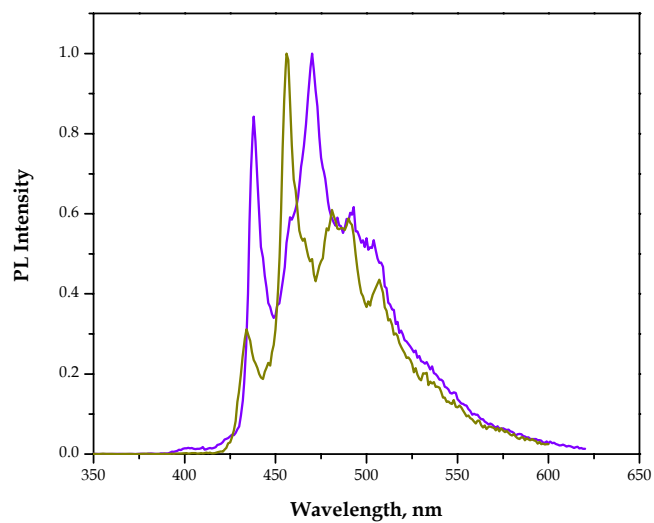

**Fig. S4** Phosphorescence measurements in 4:1 EtOH/MeOH matrices at 77 K for 4'-C≡tBu-tpy (violet line) and 4'-C≡CPh-tpy (dark yellow line).
